# Supplementary material for: Using Arctic ice mass balance buoys for evaluation of modelled ice energy fluxes
Source: Copernicus journal article supplement (doi:10.5194/gmd-13-4845-2020), 2020-10-09
Supplement: Supplementary file 1 [file gmd-13-4845-2020-supplement.zip]

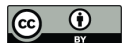

## *Supplement of*

# **Using Arctic ice mass balance buoys for evaluation of modelled ice energy fluxes**

**Alex West et al.**

*Correspondence to:* Alex West ([alex.west@metoffice.gov.uk](mailto:alex.west@metoffice.gov.uk))

- [gmd-13-4845-2020-supplement-title-page.pdf](#)
- Figures
  - [Figure\\_S1\\_false\\_bottom.png](#)
  - [Figure\\_S2\\_subs\\_ice\\_fractions.png](#)

The copyright of individual parts of the supplement might differ from the CC BY 4.0 License.
